# Supplementary material for: 1α,25-Dihydroxyvitamin D3 Improves Follicular Development and Steroid Hormone Biosynthesis by Regulating Vitamin D Receptor in the Layers Model
Source: MDPI journal article supplement (doi:10.3390/cimb45050256), 2023-05-04
Supplement: s1 [file s1]

**Supplementary Table S1.** Primers were designed according to the NCBI Gen Bank, primer sequence and PCR product length are listed.

| Gene Symbol | Accession Number | Forward Sequence (5'to3') | Reverse Sequence (5'to3') | Size (bp) |
|-------------|------------------|---------------------------|---------------------------|-----------|
| CYP19       | NM_001364699     | TGTTCCATCACGCTATTT        | GATTCTTGTTTGGGCTTC        | 239       |
| CYP11A1     | NM_001001756.1   | GTGGACACGACTTCCATGACT     | GAGAGTCTCCTTGATGGCGG      | 174       |
| CYP17A1     | NM_001001901     | TGCTCCCTCTGCTTCAACTC      | ATCCATCAGGTCCCTCACAG      | 255       |
| CYP27A1     | XM_040676620.1   | CACCACCCTTTCAGCTCCAT      | CTCCAGGTTGATGGGCTTGT      | 195       |
| HSD3B1      | NM_205118.1      | TGGAAGAAGATGAGGCGCTG      | GGAAGCTGTGTGGATGACGA      | 185       |
| HSD17B1     | NM_204837.1      | ATGGCCTCCAAGAACACCTG      | AACATCCACATGACGCTGGT      | 209       |
| STAR        | NM_204686.2      | GTCCCTCGCAGACCAAGT        | TCCCTACTGTTAGCCCTGA       | 196       |
| CYP11B1     | XM_015283751.3   | TGCCTGTTACCATCCCACAC      | GGTTGGACCATTTAGCCGGA      | 126       |
| CD36        | NM_001030731.1   | TAACAGAAAGCTGTGGGCTCC     | AACAGAGCTTCCTGGCACAA      | 175       |
| VLDLR       | NM_205229.1      | AGACTGTTTACAGACGGCAGTG    | CACTGGGTTGACTGAGGACC      | 213       |
| ABCA1       | NM_204145.2      | CGCCGTTTCTTGTGGAAGT       | CAGACACCTGAATCGCCCAT      | 138       |
| SPP1        | NM_204535.4      | ATTTGACAGCCCTGAGGTGG      | CAATGCTGTGGCGATCTTCG      | 146       |
| PLTP        | NM_001162406.1   | GAAGTATGCGTGCATGGCTG      | CAGCAAGAGCAAGCCAACAG      | 155       |
| WNT6        | NM_001007594.2   | GACAGAGTGCAAATGCCACG      | GAGATCCTGCTTGTCTGGGAG     | 196       |
| NR5A1       | NM_205077.1      | GAGGATCTGGACGAGCTGTG      | TCTTGCAGTTCTGGCTCTCG      | 151       |
| BMP15       | NM_001006589.2   | GACAAAAGCGACTGCTCCCT      | CTTACAGTAGCGGGGTTGT       | 105       |
| PTGS2       | NM_001167719.1   | AGGAGCATCCAGAGTGGAT       | TTCAGCTGCGATTTCGGTTCT     | 188       |
| LHX9        | NM_205426.1      | ATCCCAGAAGACAAAGCGCA      | TTGGCATCTGGGTTGTGGTT      | 96        |
| ZP4         | NM_204879.1      | GGAGCTTGCAGCTCACCTTA      | CGGACAGCAGAACAGACACT      | 331       |
| CEL         | NM_001012997.1   | CCAAACTGATGTCCGTGGGA      | CCGTAGTTCCCTGGCATGTT      | 279       |
| VDR         | NM_205098        | AGTCAGCGATGTCACCCAAG      | TCTGGAGGATGTCCGAGAGG      | 206       |
| FSHR        | NM_205079        | GAGCGAGGTCTACATACA        | GCACAAGCCATAGTCA          | 281       |
| ESR1        | NM_205183.2      | GCCTGGCAGGATTTCACTCT      | GCCTCCCTCATCCCAAAGCT      | 154       |
| ESR2        | NM_204794.2      | TGTGGGTATCGAATCCTGCG      | ACATTGGGAGGCTCAGCTTC      | 161       |
| CDK2        | NM_001199857     | ACGTGATCCACACGGAGAAC      | GCAGCTGGAACAGGTAGCTC      | 132       |
| CCNE1       | NM_001031358     | AGGTTTATGGCAACACAACAGAA   | AACTGGTGCAACTTTGGTGG      | 116       |
| CCND1       | NM_205381        | ATAGTCGCCACTTGATGCT       | AACCGGCTTTTCTTGAGGGG      | 122       |
| CDKN1A      | NM_204396        | TACGAAGCAATGCCGAGTCT      | TCAGTCCCTTCCGTGGTCTT      | 116       |
| CDKN1B      | NM_204256        | GAGCCCGAGACGACATCAAA      | TCCCATGGAGACCGACGATA      | 133       |
| ATM         | NM_001162400     | TCCCGCATTTTCTCGCAGAT      | TCAAGGGAAGAGGCGTTGAC      | 123       |
| BCL2        | NM_205339.3      | GCTGCTTTACTCTTGGGGGT      | CTTCAGCACTATCTCGCGGT      | 128       |
| CASP3       | NM_204725.2      | CAGCTGAAGGCTCCTGGTTT      | GCCACTCTGCGATTTACACG      | 106       |
| CASP9       | XM_424580.7      | AGCTGTTGACAAGAGTGACCA     | TTCCGCAGCTCCACATCAAT      | 223       |
| GAPDH       | NM_204305        | GAGGGTAGTGAAGGCTGCTG      | CACAACACGGTTGCTGTATC      | 199       |

**Supplementary Table S2.** Different expressed genes are involved in ovarian steroidogenesis and cholesterol metabolism of chicken SYFs.

| Gene ID     | Gene<br>symbol | CON-LVD |                | CON-HVD |                | LVD-HVD |                |
|-------------|----------------|---------|----------------|---------|----------------|---------|----------------|
|             |                | log2fc  | <i>P</i> value | log2fc  | <i>P</i> value | log2fc  | <i>P</i> value |
| ncbi_414854 | CYP19A1        | 0.686   | 0.014          | -0.023  | 0.942          | -0.709  | 0.252          |
| ncbi_425056 | CYP17A1        | 0.069   | 0.539          | 0.109   | 0.446          | 0.041   | 0.898          |
| ncbi_431683 | CYP27A1        | 0.034   | 0.579          | 0.346   | 0.028          | 0.313   | 0.144          |
| ncbi_396015 | HSD3B1         | 0.242   | 0.231          | 0.025   | 0.800          | -0.217  | 0.381          |
| ncbi_417165 | HSD17B1        | 0.527   | 0.120          | -0.257  | 0.543          | -0.784  | 0.031          |
| ncbi_395421 | STAR           | 0.089   | 0.792          | 0.833   | 0.204          | 0.743   | 0.199          |
| ncbi_421466 | CYP11B1        | 0.276   | 0.116          | 0.189   | 0.332          | -0.087  | 0.493          |
| ncbi_417730 | CD36           | 0.393   | 0.573          | 0.921   | 0.028          | 0.528   | 0.552          |
| ncbi_396154 | VLDLR          | 0.056   | 0.406          | 0.351   | 0.018          | 0.295   | 0.089          |
| ncbi_373945 | ABCA1          | 0.354   | 0.256          | 0.749   | 0.008          | 0.395   | 0.343          |
| ncbi_423176 | ASTL           | -0.073  | 0.986          | 1.221   | 0.075          | 1.294   | 0.092          |
| ncbi_428164 | PLTP           | 0.391   | 0.060          | 0.642   | 0.015          | 0.251   | 0.468          |
| ncbi_395235 | WNT6           | 0.305   | 0.246          | 0.659   | 0.034          | 0.354   | 0.376          |
| ncbi_395960 | NR5A1          | 0.259   | 0.129          | 0.922   | 0.080          | 0.663   | 0.088          |
| ncbi_428697 | BMP15          | -1.573  | 0.0004         | -0.539  | 0.345          | 1.034   | 0.078          |
| ncbi_396451 | PTGS2          | -0.832  | 0.005          | -0.219  | 0.650          | 0.613   | 0.135          |
| ncbi_396397 | LHX9           | -0.241  | 0.845          | -0.818  | 0.018          | -0.577  | 0.219          |
| ncbi_395692 | ZP4            | -1.752  | 7.17E-05       | -1.038  | 0.025          | 0.713   | 0.253          |
| ncbi_417165 | CEL            | -0.412  | 0.565          | 1.450   | 0.004          | 1.862   | 0.0001         |
| ncbi_418307 | TRPV6          | 0.696   | 0.184          | 1.028   | 0.029          | 0.333   | 0.580          |

Supplementary Figure S1

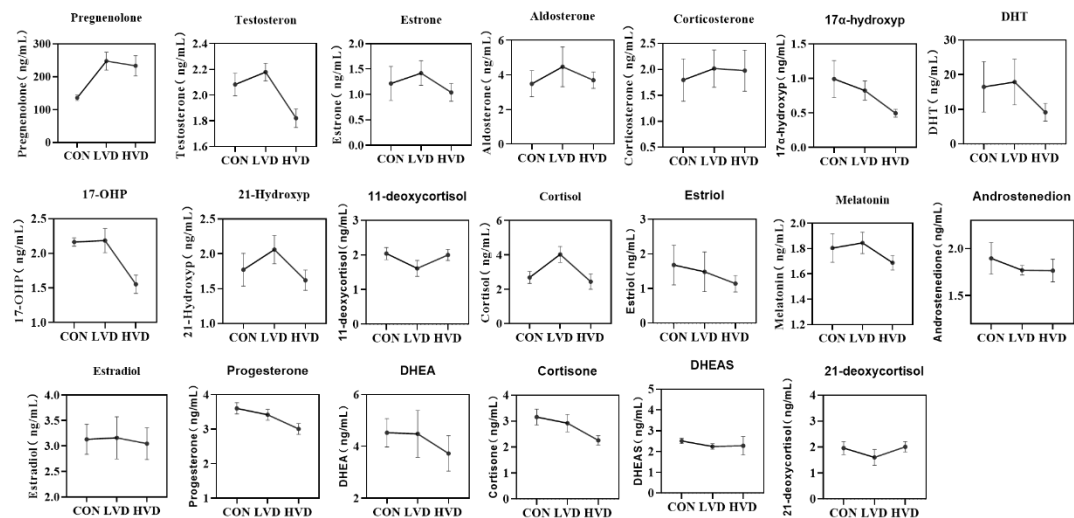

**Supplementary Figure S1.** The concentration distribution of differential 20 steroid hormones in layers SYF fluid among the three groups. Values expressed as means  $\pm$  SEM (n=6). CON: with calcitriol 0  $\mu$ g/kg BW; LVD: with calcitriol 10  $\mu$ g/kg BW; HVD: with calcitriol 100  $\mu$ g/kg BW; VitD<sub>3</sub>: 1 $\alpha$ , 25-dihydroxy vitaminD<sub>3</sub>.

## Supplementary Figure S2

A

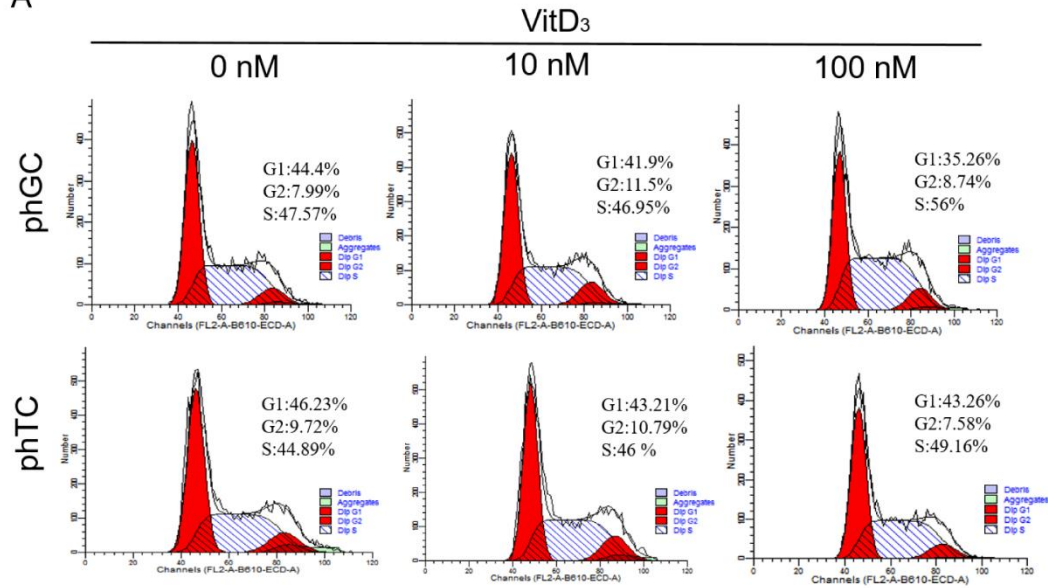

B

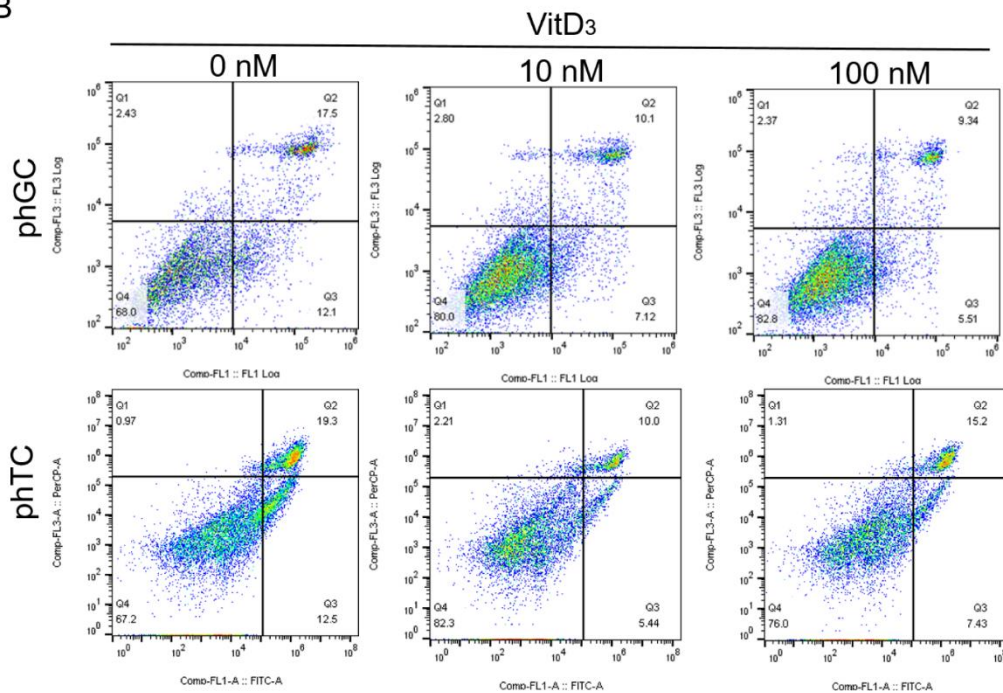

**Supplementary Figure S2.** Flow cytometric analysis of cell cell and cell apoptosis in phGCs and phTCs among the three groups. (A) Flow cytometric analysis of cell cycle in phGCs and phTCs after VitD<sub>3</sub> treatment. The percentages of cells in the G1, G2, and S phases were determined of cell cycle progression in phGCs and phTCs. (B) Flow cytometric analysis of cell apoptosis in phGCs and phTCs after VitD<sub>3</sub> treatment. Flow cytometry was utilized to analyze cell apoptosis, employing AnnexinV+/PI method. The percentages of apoptosis (AnnexinV+/PI- and AnnexinV+/PI+) cells data were presented as the means  $\pm$  SEM (n=3). Multiple comparisons were carried out using Duncan's post hoc comparison. Cultured phGCs and phTCs were treated with VitD<sub>3</sub> at 0, 10, and 100 nM for 24 h. phGCs: granulosa cells from

prehierarchical follicles; phTCs: theca cells from prehierarchal follicles; VitD<sub>3</sub>: 1 $\alpha$ , 25-dihydroxy vitaminD<sub>3</sub>.
